# Supplementary material for: Astrocytes regulate the balance between plasminogen activation and plasmin clearance via cell-surface actin
Source: PubMed Central journal article supplement (PMC5318850; doi:10.1038/celldisc.2017.1), 2017-02-21
Supplement: celldisc20171-s1.pdf [file celldisc20171-s1.pdf]

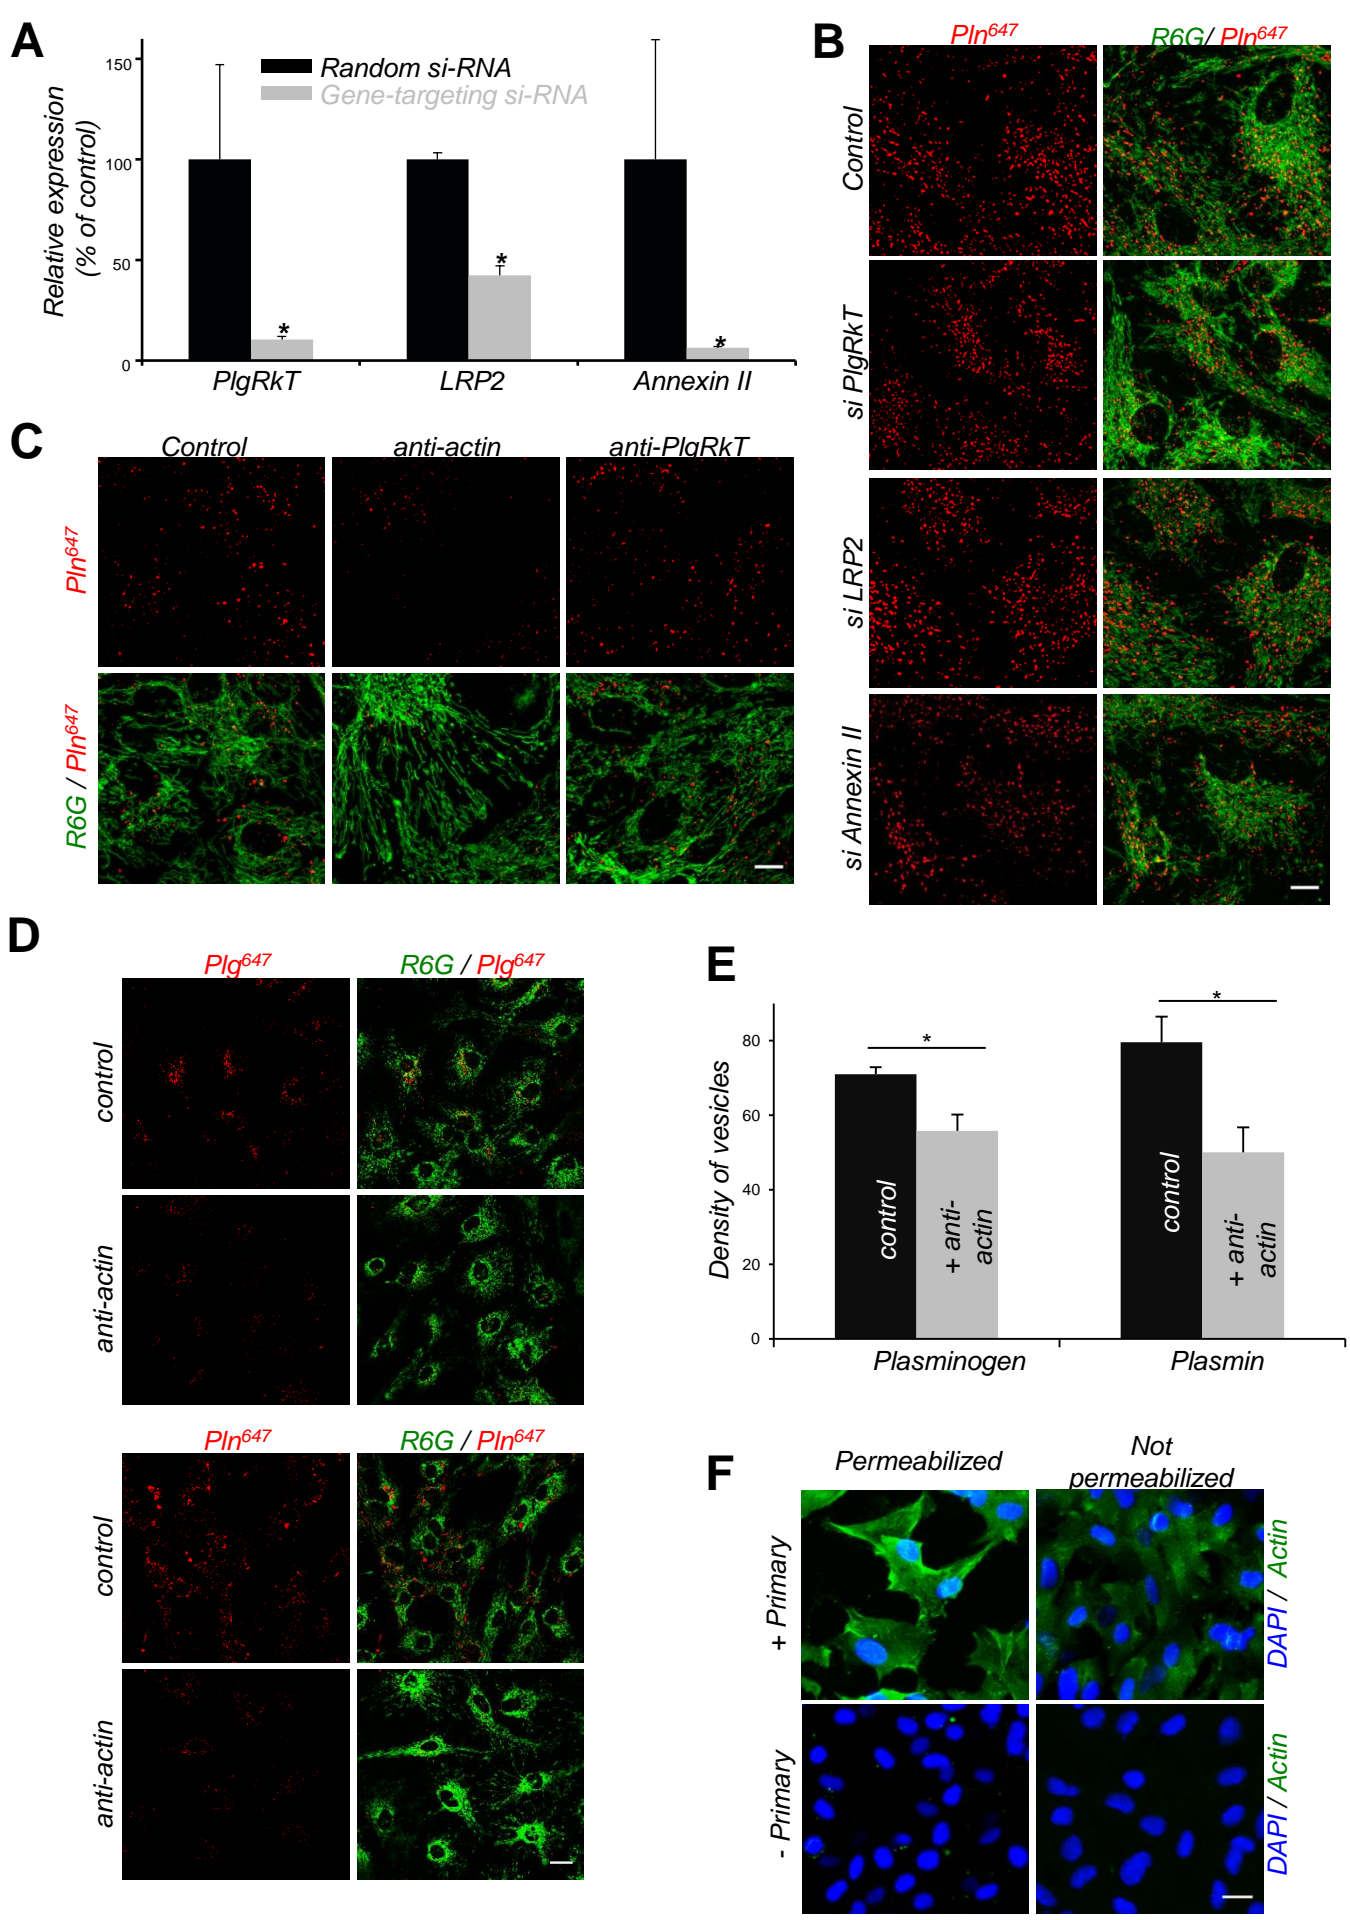

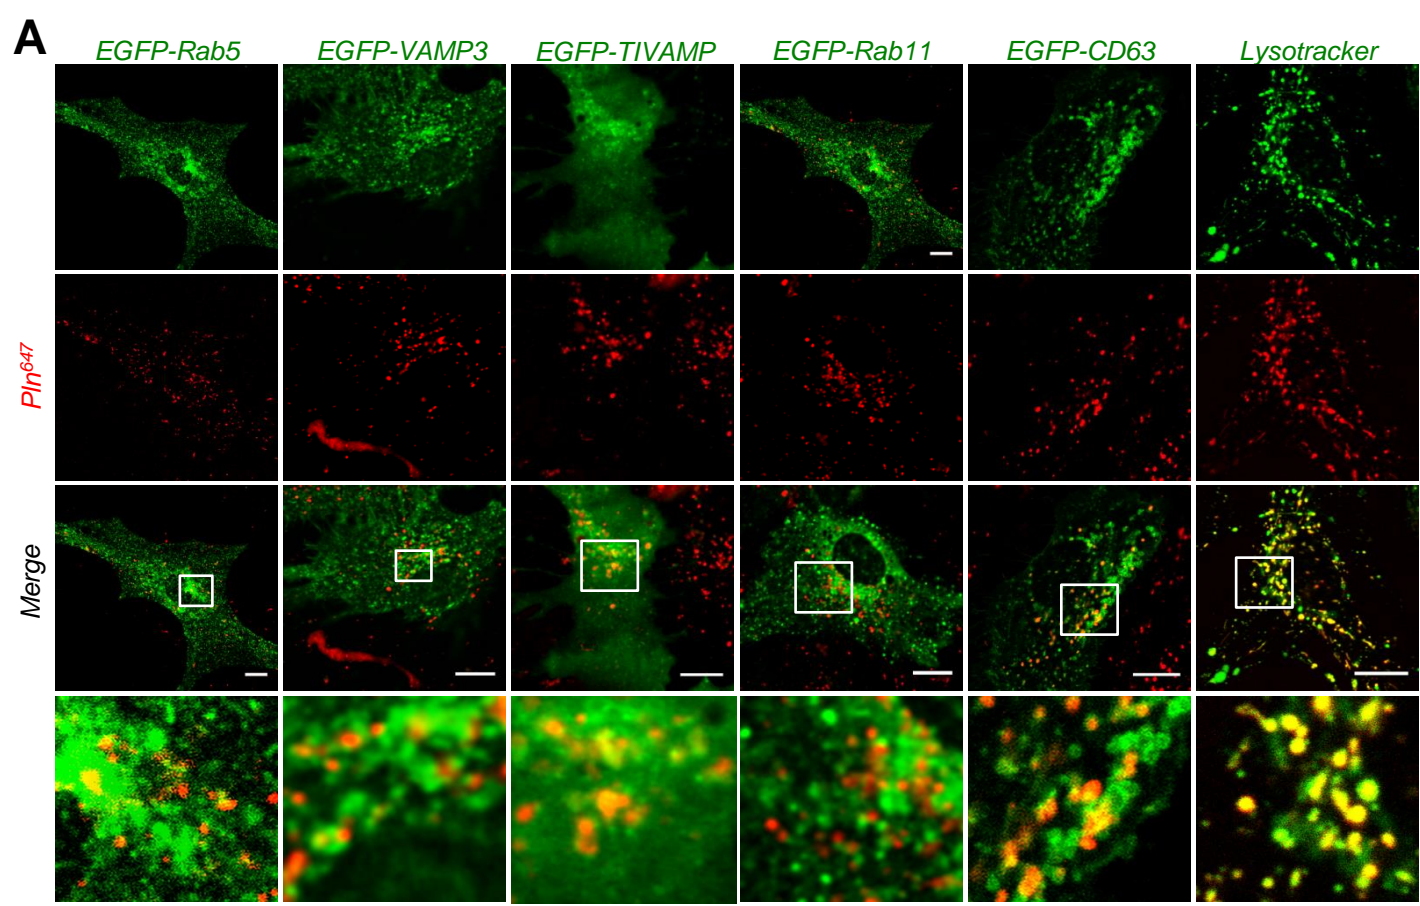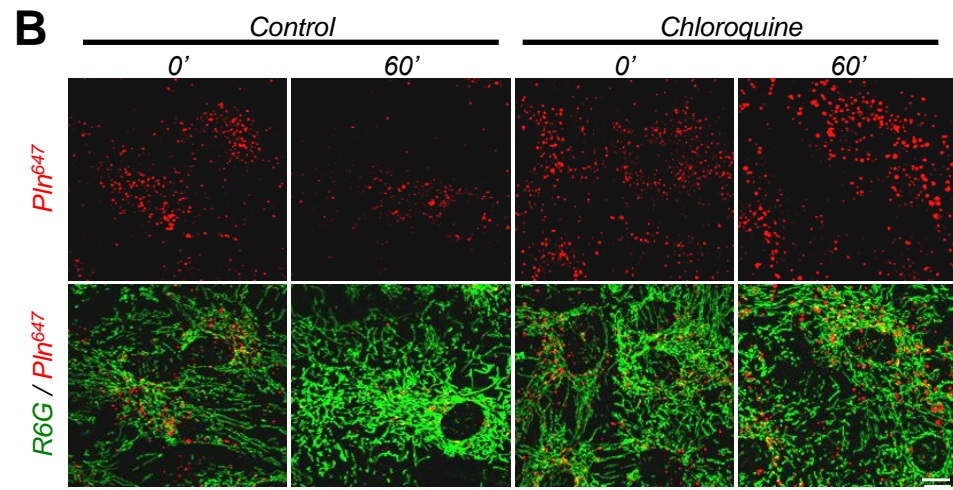

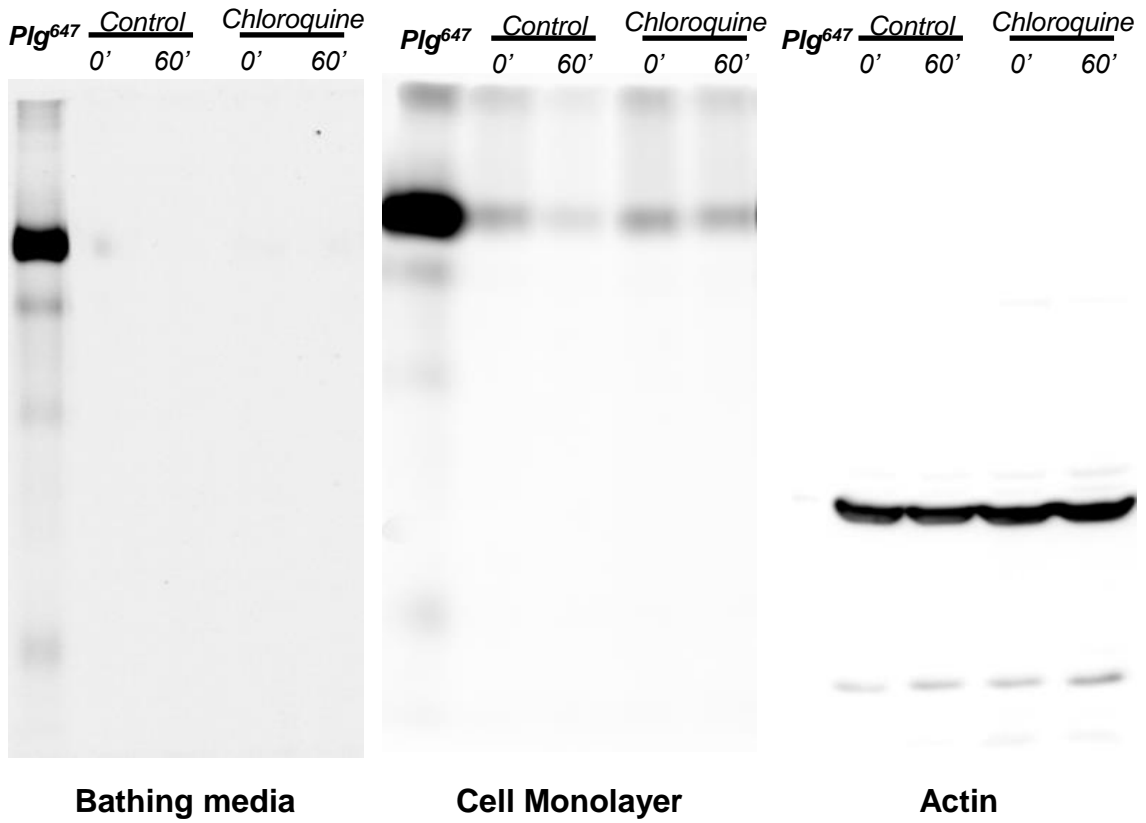

Suppl. Figure 3

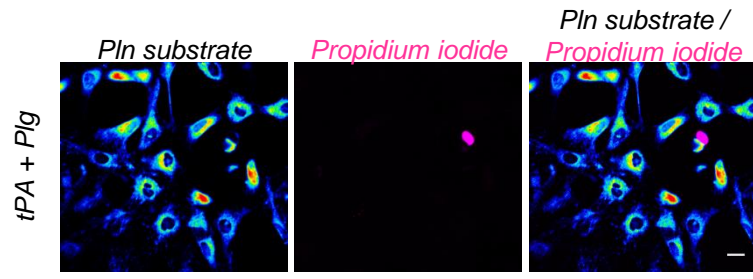

Suppl. Figure 4

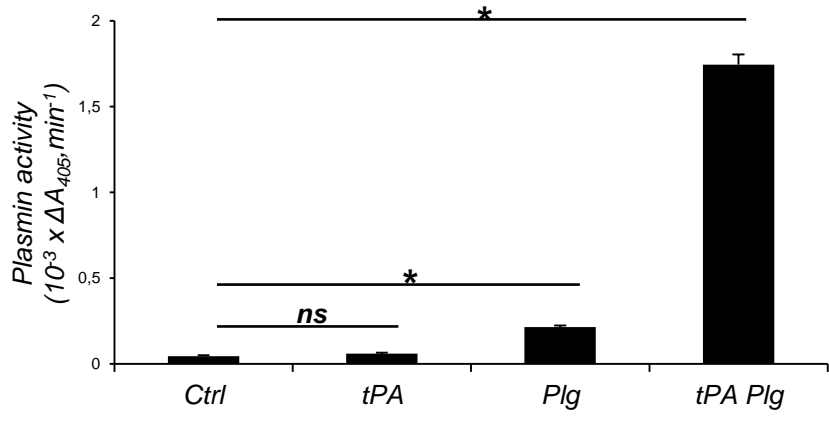

Suppl. Figure 5

**Supplementary Figure 1.** (A) Relative expression of PlgR<sub>KT</sub>, LRP2 and Annexin II mRNA in astrocytes transfected with specific gene-targeting siRNAs (grey bars) or with random si-RNAs (black bars). Histograms show means  $\pm$  SEM. \*Significantly different from “control” condition ( $P < 0.05$ ). (B) Representative confocal images of Pln<sup>647</sup> (25nM, red) uptake in astrocytes (R6G, green) transfected for 48 hours with random siRNAs (control) or with siRNA directed against Plg-R<sub>KT</sub>, LRP-2 or Annexin II; n=5. (C) Representative confocal images of Pln<sup>647</sup> (25nM, for 1h, red) and uptake in astrocytes (R6G, green) co-incubated with blocking antibodies against actin (25nM) or Plg-R<sub>KT</sub> (170nM); n=4. (D) Representative confocal images of Plg<sup>647</sup> (incubated for 2h, 25nM, red, top) or Pln<sup>647</sup> (incubated for 1h, 25nM, red, bottom) uptake in astrocytes (R6G, green) co-incubated in the absence (*control*) or in the presence (*anti-actin*) of monoclonal anti-actin antibody (150 nM). (E) Corresponding quantification of density (number of vesicles/ $10^3 \mu\text{m}^3$ ) of fluorescent vesicles for Plg (incubated for 2h, left) and Pln (incubated for 1h, right) in the absence (*control*, black bars) or in the presence (+ *anti-actin*, grey bars) of monoclonal anti-actin antibody ; n=3. Data show means  $\pm$  SEM. \*Significantly different from corresponding “control” condition ( $P < 0.05$ ). (F) Representative photomicrograph of permeabilized (left) or not permeabilized (right) cultured astrocytes labelled (+ *Primary*, top) with polyclonal anti-actin antibody (*Actin*, 1:40<sup>th</sup>, green) and DAPI. We checked specificity of the staining with a control without primary antibody (- *Primary*, bottom). Scale bars: 20  $\mu\text{m}$ .

**Supplementary Figure 2.** (A) Representative confocal images of cultured astrocytes transfected during 48 hours with pEGFP-Rab5, pEGFP-TI-VAMP, pEGFP-VAMP3 or pEGFP-CD63 vectors (top, green) show colocalization of Pln<sup>647</sup> (25 nM, 1h, middle, red) and Rab5, TI-VAMP, VAMP-3, CD63 but not with Rab11. Co-incubation of LysoTracker® (50 nM, green) and Pln<sup>647</sup> (25nM for 1h, red) shows lysosomal localization of plasminogen (n=3). (B) Representative confocal images of cultured astrocytes subjected to follow-up experiments as described above (figure 6D) in the absence or in the presence of chloroquine (10 µM; n=3). Scale bars: 10 µm.

**Supplementary Figure 3:** Whole immunoblot corresponding to Figure 6B.

**Supplementary figure 4:** Representative photomicrographs of cultured astrocytes incubated with Propidium Iodide (1 µg/ml, pink) to label dead cells and co-incubated with recombinant tPA (25nM), plasminogen (50nM) and plasmin specific fluorescent substrate (Pln substrate) to reveal plasmin activity. Scale bars: 20 µm.

**Supplementary Figure 5:** Cultured astrocytes were incubated alone (Ctrl) or with recombinant tPA (tPA, 10nM), recombinant plasminogen (Plg, 25nM) or a combination of tPA and Plg (tPA/Plg, 10nM/25nM), and plasmin activity was measured with quantitative enzymatic assay.
